# Supplementary material for: Dynamic wrinkling pattern exhibiting tunable fluorescence for anticounterfeiting applications
Source: PubMed Central journal article supplement (PMC7156701; doi:10.1038/s41467-020-15600-6), 2020-04-14
Supplement: 41467_2020_15600_MOESM3_ESM.pdf [file 41467_2020_15600_MOESM3_ESM.pdf]

## **Description of Additional Supplementary Files**

File Name: Supplementary Data 1

Description: In situ observation of the fluorescence color under 592 ppm HCl vapor as well as the wrinkled topography
